# Supplementary material for: Rapid 3-dimensional shape determination of globular proteins by mobility capillary electrophoresis and native mass spectrometry
Source: Royal Society of Chemistry journal article supplement (doi:10.1039/d0sc01965h), 2020-01-01
Supplement: d0sc01965h1.pdf [file d0sc01965h1.pdf]

## Supporting Information

### Rapid 3-dimensional Shape Determination of Globular Proteins by Mobility Capillary Electrophoresis and Native Mass Spectrometry

Haimei Wu,<sup>1#</sup> Rongkai Zhang,<sup>1#</sup> Wenjing Zhang,<sup>1</sup> Jie Hong,<sup>1</sup> Ye Xiang<sup>2\*</sup> and Wei  
Xu<sup>1\*</sup>

<sup>1</sup>Department of Biomedical Engineering, School of Life Science, Beijing Institute of  
Technology, Beijing 100081, China

<sup>2</sup>Beijing Advanced Innovation Center for Structural Biology, Department of Basic  
Medical Sciences, School of Medicine, Tsinghua University, Beijing 100084, China

\*Corresponding Authors:

|                                                                                                                                                                                                                                                                          |                                                                                                                                                                                                                 |
|--------------------------------------------------------------------------------------------------------------------------------------------------------------------------------------------------------------------------------------------------------------------------|-----------------------------------------------------------------------------------------------------------------------------------------------------------------------------------------------------------------|
| Wei Xu<br>School of Life Science<br>Beijing Institute of Technology<br>Haidian, Beijing, 100081, China<br>Email: <a href="mailto:weixu@bit.edu.cn">weixu@bit.edu.cn</a><br>Web:<br><a href="http://www.escience.cn/people/weixu">http://www.escience.cn/people/weixu</a> | Ye Xiang<br>Department of Basic Medical Sciences,<br>School of Medicine<br>Tsinghua University<br>Beijing, 100084, China<br>Email: <a href="mailto:yxiang@mail.tsinghua.edu.cn">yxiang@mail.tsinghua.edu.cn</a> |
|--------------------------------------------------------------------------------------------------------------------------------------------------------------------------------------------------------------------------------------------------------------------------|-----------------------------------------------------------------------------------------------------------------------------------------------------------------------------------------------------------------|

#Equal contribution

**Table S1.** Measured and calculated parameters of 52 globular proteins ranging in size from 4.7 to 68.7 kDa.

| Protein name                             | PDB<br>id | SASA<br>(nm <sup>2</sup> ) | a <sub>SASA</sub><br>(nm) | a <sub>MD</sub><br>(nm) | b <sub>MD</sub><br>(nm) | c <sub>MD</sub><br>(nm) |
|------------------------------------------|-----------|----------------------------|---------------------------|-------------------------|-------------------------|-------------------------|
| Zinc-finger domains                      | 1zfd      | 30.19                      | 1.55                      | 1.78                    | 1.18                    | 0.66                    |
| Agglutinin-toxin motif                   | 1hev*     | 32.17                      | 1.60                      | 1.45                    | 1.20                    | 0.91                    |
| Ferredoxin(A)                            | 1vjw      | 35.89                      | 1.69                      | 1.59                    | 1.19                    | 1.10                    |
| Chymotrypsin inhibitor II                | 1ciq*     | 40.72                      | 1.80                      | 1.68                    | 1.48                    | 0.97                    |
| Ribosomal protein L7/L12                 | 1ctf      | 41.62                      | 1.82                      | 1.87                    | 1.23                    | 1.13                    |
| Ubiquitin                                | 1ubq      | 47.78                      | 1.95                      | 1.86                    | 1.41                    | 1.21                    |
| P13K SH3 domain                          | 1pht      | 52.30                      | 2.04                      | 1.88                    | 1.52                    | 1.27                    |
| Oxidized uteroglobin                     | 1utg*     | 52.81                      | 2.05                      | 2.14                    | 1.69                    | 1.00                    |
| Pyruvate dehydrogenase complex           | 1iyv      | 53.85                      | 2.07                      | 2.25                    | 1.26                    | 1.24                    |
| Translation initiation factor            | 1tig      | 54.89                      | 2.09                      | 2.19                    | 1.42                    | 1.17                    |
| Cellulose domain (Cellulomonas fimi)     | 1exg      | 57.55                      | 2.14                      | 2.32                    | 1.47                    | 1.19                    |
| Llama heavy chain variable domain        | 1hcv      | 60.82                      | 2.20                      | 2.24                    | 1.40                    | 1.35                    |
| Hepatocyte growth factor                 | 2hgf      | 62.49                      | 2.23                      | 2.00                    | 1.62                    | 1.24                    |
| HIT protein substrate                    | 1kpf      | 68.81                      | 2.34                      | 2.10                    | 1.68                    | 1.49                    |
| Yeast cofilin                            | 1cof      | 72.38                      | 2.40                      | 2.43                    | 1.76                    | 1.32                    |
| Cellular retinoic acid binding protein I | 1cbi      | 73.59                      | 2.42                      | 2.21                    | 1.85                    | 1.50                    |
| Glycera dibranchiata hemoglobin          | 1hbg*     | 74.82                      | 2.44                      | 2.31                    | 1.90                    | 1.28                    |
| Avian sarcoma virus integrase            | 1vsd      | 81.07                      | 2.54                      | 2.63                    | 1.73                    | 1.43                    |
| Biliverdin apomyoglobin complex          | 1bvc*     | 81.71                      | 2.55                      | 2.35                    | 2.10                    | 1.32                    |
| Ribonuclease H                           | 2rn2*     | 88.25                      | 2.65                      | 2.43                    | 2.02                    | 1.44                    |
| Dextrin                                  | 1ak6      | 90.26                      | 2.68                      | 2.72                    | 1.74                    | 1.45                    |
| Scytalone dehydratase                    | 1std      | 90.26                      | 2.68                      | 2.78                    | 1.63                    | 1.60                    |
| Trypsin                                  | 2blv*     | 92.97                      | 2.72                      | 2.50                    | 2.07                    | 1.57                    |
| Peptide deformylase                      | 1dff      | 95.03                      | 2.75                      | 2.54                    | 1.96                    | 1.50                    |
| Human growth hormone                     | 1huw      | 95.03                      | 2.75                      | 2.95                    | 1.82                    | 1.43                    |
| Yellow fluorescent protein               | 2yfp      | 101.36                     | 2.84                      | 2.74                    | 1.91                    | 1.68                    |
| GroEL-polypeptide recognition            | 1kid      | 102.07                     | 2.85                      | 2.80                    | 1.91                    | 1.54                    |
| Green fluorescent protein                | 1w7s      | 107.88                     | 2.93                      | 2.79                    | 1.95                    | 1.70                    |
| Xylanase from Penicillium simplicissimum | 1bg4      | 107.88                     | 2.93                      | 2.98                    | 2.23                    | 1.66                    |
| Phospholipase C (Bacillus cereus)        | 1ah7      | 108.62                     | 2.94                      | 3.03                    | 1.97                    | 1.66                    |
| L-2-haloacid dehalogenase                | 1jud      | 108.62                     | 2.94                      | 2.89                    | 2.00                    | 1.68                    |
| The periplasmic -binding protein         | 1lst      | 108.62                     | 2.94                      | 3.06                    | 1.91                    | 1.63                    |
| Uracil-DNA glycosylase                   | 1udg      | 110.10                     | 2.96                      | 2.78                    | 2.12                    | 1.66                    |
| Human nuclear receptor RAR gamma.        | 3lbd      | 112.34                     | 2.99                      | 2.97                    | 2.15                    | 1.55                    |
| Recombinant ricin A-chain                | 1ift      | 117.67                     | 3.06                      | 2.87                    | 2.28                    | 1.71                    |
| Porcine pepsin                           | 5pep      | 133.55                     | 3.26                      | 3.35                    | 2.25                    | 1.78                    |
| Complex of Y216F D-ALA                   | 1iow      | 136.02                     | 3.29                      | 3.29                    | 2.32                    | 1.73                    |
| Arthromyces ramosus peroxidase           | 1arv      | 136.02                     | 3.29                      | 3.22                    | 2.21                    | 1.92                    |
| Holotransferrin,N-lobe(human)            | 1a8e      | 139.35                     | 3.33                      | 3.30                    | 2.30                    | 1.85                    |

|                                            |       |        |      |      |      |      |
|--------------------------------------------|-------|--------|------|------|------|------|
| Calmodulin-dependent protein kinase        | 1a06  | 140.19 | 3.34 | 3.51 | 2.15 | 1.75 |
| Lactate dehydrogenase                      | 1ldg  | 142.72 | 3.37 | 3.12 | 2.26 | 2.00 |
| Cyclin MCS2                                | 1jkw  | 148.71 | 3.44 | 3.66 | 2.23 | 1.67 |
| Exo-amylase                                | 1jdd  | 152.18 | 3.48 | 3.53 | 2.39 | 1.98 |
| TRNA-guanine transglycosylase              | 1pud  | 153.94 | 3.50 | 3.28 | 2.48 | 2.05 |
| Maltodextrin binding protein               | 1anf  | 155.70 | 3.52 | 3.44 | 2.50 | 1.83 |
| CU-nitrite reductase                       | 1nif* | 156.59 | 3.53 | 3.29 | 2.94 | 1.57 |
| Dihydrolipoamide dehydrogenase             | 1ojt* | 159.26 | 3.56 | 3.84 | 3.15 | 2.14 |
| HhaI methyltransferase with adohcy and DNA | 6mht  | 161.06 | 3.58 | 3.58 | 2.20 | 2.05 |
| Human salivary alpha-amylase               | 1smd  | 180.50 | 3.79 | 3.97 | 2.39 | 2.20 |
| Photolyase                                 | 1qnf  | 210.21 | 4.09 | 4.13 | 2.40 | 2.37 |
| Benzoylformate decarboxylase               | 1bfd* | 211.24 | 4.10 | 3.84 | 3.18 | 2.10 |
| Galactose oxidase                          | 1gof  | 219.56 | 4.18 | 4.18 | 2.74 | 2.38 |

\*oblate protein

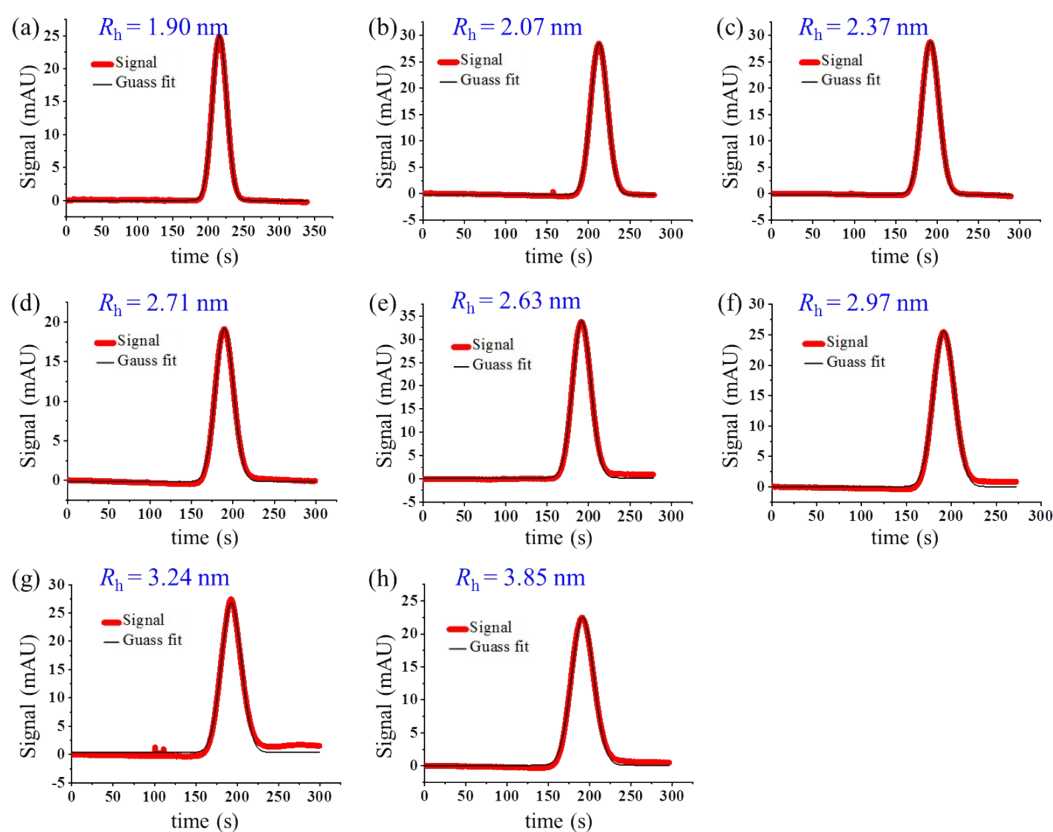

**Figure S1.** TDA spectra of eight proteins. (a) insulin; (b) cytochrome C; (c) myoglobin; (d) carbonic anhydrase I; (e)  $\alpha$ 1-chymotrypsinogen; (f)  $\beta$ -lactoglobulin dimer; (g) ovalbumin; (h) human serum albumin.
